# Supplementary material for: Advances in the development of pyridinone derivatives as non-nucleoside reverse transcriptase inhibitors
Source: Royal Society of Chemistry journal article supplement (doi:10.1039/c5ra25722k), 2015-12-21
Supplement: c5ra25722k1.xlsx [file c5ra25722k1.xlsx]

## Sheet: Hoja1
Table S1. Crystal Structures of HIV Reverse Transcriptase in Protein Data Bank (as per December, 2015).
PDB ID	Ligand ID	Ligand Name	Source Organism	Database containing sequence	Database ID
1BQM	HBY	(S)-4-ISOPROPOXYCARBONYL-6-METHOXY-3-METHYLTHIOMETHYL-3,4-DIHYDROQUINOXALIN-2(1H)-THIONE	Human immunodeficiency virus 1	UniProt	P03366
1BQN	HBY	(S)-4-ISOPROPOXYCARBONYL-6-METHOXY-3-METHYLTHIOMETHYL-3,4-DIHYDROQUINOXALIN-2(1H)-THIONE	Human immunodeficiency virus 1	UniProt	P03366
1C0T	BM1	(R)-(+)9B-(3-METHYL)PHENYL-2,3-DIHYDROTHIAZOLO[2,3-A]ISOINDOL-5(9BH)-ONE	Human immunodeficiency virus 1	UniProt	P04585
1C0U	BM5	(R)-(+) 5(9BH)-OXO-9B-PHENYL-2,3-DIHYDROTHIAZOLO[2,3-A]ISOINDOL-3-CARBOXYLIC ACID METHYL ESTER	Human immunodeficiency virus 1	UniProt	P04585
1C1B	GCA	6-(3',5'-DIMETHYLBENZYL)-1-ETHOXYMETHYL-5-ISOPROPYLURACIL	Human immunodeficiency virus 1	UniProt	P04585
1C1C	612	6-(CYCLOHEXYLSULFANYL)-1-(ETHOXYMETHYL)-5-(1-METHYLETHYL)PYRIMIDINE-2,4(1H,3H)-DIONE	Human immunodeficiency virus 1	UniProt	P04585
1DLO			Human immunodeficiency virus 1	UniProt	P03366
1DTQ	FPT	N-[[3-FLUORO-4-ETHOXY-PYRID-2-YL]ETHYL]-N'-[5-NITRILOMETHYL-PYRIDYL]-THIOUREA	Human immunodeficiency virus 1	UniProt	P04585
1DTT	FTC	N-[[3-FLUORO-4-ETHOXY-PYRID-2-YL]ETHYL]-N'-[5-CHLORO-PYRIDYL]-THIOUREA	Human immunodeficiency virus 1	UniProt	P04585
1EET	BFU	1-(5-BROMO-PYRIDIN-2-YL)-3-[2-(6-FLUORO-2-HYDROXY-3-PROPIONYL-PHENYL)-CYCLOPROPYL]-UREA	Human immunodeficiency virus 1	UniProt	P03366
1EP4	S11	5-(3,5-DICHLOROPHENYL)THIO-4-ISOPROPYL-1-(PYRIDIN-4-YL-METHYL)-1H-IMIDAZOL-2-YL-METHYL CARBAMATE	Human immunodeficiency virus 1	UniProt	P04585
1FK9	EFZ	(-)-6-CHLORO-4-CYCLOPROPYLETHYNYL-4-TRIFLUOROMETHYL-1,4-DIHYDRO-2H-3,1-BENZOXAZIN-2-ONE	Human immunodeficiency virus 1	UniProt	P04585
1FKO	EFZ	(-)-6-CHLORO-4-CYCLOPROPYLETHYNYL-4-TRIFLUOROMETHYL-1,4-DIHYDRO-2H-3,1-BENZOXAZIN-2-ONE	Human immunodeficiency virus 1	UniProt	P04585
1FKP	NVP	11-CYCLOPROPYL-5,11-DIHYDRO-4-METHYL-6H-DIPYRIDO[3,2-B:2',3'-E][1,4]DIAZEPIN-6-ONE	Human immunodeficiency virus 1	UniProt	P04585
1HAR			Human immunodeficiency virus 1	UniProt	P03366
1HMV			Human immunodeficiency virus 1	UniProt	P03366
1HNI	AAA	(2-ACETYL-5-METHYLANILINO)(2,6-DIBROMOPHENYL)ACETAMIDE	Human immunodeficiency virus 1	UniProt	P03366
1HNV	TBO	5-CHLORO-8-METHYL-7-(3-METHYL-BUT-2-ENYL)-6,7,8,9-TETRAHYDRO-2H-2,7,9A-TRIAZA-BENZO[CD]AZULENE-1-THIONE	Human immunodeficiency virus 1	UniProt	P03366
1HPZ	AAP	ALPHA-(2,6-DICHLOROPHENYL)-ALPHA-(2-ACETYL-5-METHYLANILINO)ACETAMIDE	Human immunodeficiency virus 1	UniProt	P03366
1HQE			Human immunodeficiency virus 1	UniProt	P03366
1HQU	HBY	(S)-4-ISOPROPOXYCARBONYL-6-METHOXY-3-METHYLTHIOMETHYL-3,4-DIHYDROQUINOXALIN-2(1H)-THIONE	Human immunodeficiency virus 1	UniProt	P03366
1HRH			Human immunodeficiency virus 1	UniProt	P03366
1HVU			Human immunodeficiency virus 1	UniProt	P03366
1HYS			Human immunodeficiency virus 1	UniProt	P03366
1IKV	EFZ	(-)-6-CHLORO-4-CYCLOPROPYLETHYNYL-4-TRIFLUOROMETHYL-1,4-DIHYDRO-2H-3,1-BENZOXAZIN-2-ONE	Human immunodeficiency virus 1	UniProt	P03366
1IKW	EFZ	(-)-6-CHLORO-4-CYCLOPROPYLETHYNYL-4-TRIFLUOROMETHYL-1,4-DIHYDRO-2H-3,1-BENZOXAZIN-2-ONE	Human immunodeficiency virus 1	UniProt	P03366
1IKX	PNU	6-CHLORO-2-(1-FURO[2,3-C]PYRIDIN-5-YL-ETHYLSULFANYL)-PYRIMIDIN-4-YLAMINE	Human immunodeficiency virus 1	UniProt	P03366
1IKY	MSD	1-[2-(3-ACETYL-2-HYDROXY-6-METHOXY-PHENYL)-CYCLOPROPYL]-3-(5-CYANO-PYRIDIN-2-YL)-THIOUREA	Human immunodeficiency virus 1	UniProt	P03366
1J5O			Human immunodeficiency virus 1	UniProt	P03366
1JKH	EFZ	(-)-6-CHLORO-4-CYCLOPROPYLETHYNYL-4-TRIFLUOROMETHYL-1,4-DIHYDRO-2H-3,1-BENZOXAZIN-2-ONE	HIV-1 M:B_HXB2R	UniProt	P04585
1JLA	TNK	6-BENZYL-1-BENZYLOXYMETHYL-5-ISOPROPYL URACIL	HIV-1 M:B_HXB2R	UniProt	P04585
1JLB	NVP	11-CYCLOPROPYL-5,11-DIHYDRO-4-METHYL-6H-DIPYRIDO[3,2-B:2',3'-E][1,4]DIAZEPIN-6-ONE	HIV-1 M:B_HXB2R	UniProt	P04585
1JLC	FTC	N-[[3-FLUORO-4-ETHOXY-PYRID-2-YL]ETHYL]-N'-[5-CHLORO-PYRIDYL]-THIOUREA	HIV-1 M:B_HXB2R	UniProt	P04585
1JLE	CSD	3-SULFINOALANINE	HIV-1 M:B_HXB2R	UniProt	P04585
1JLF	NVP	11-CYCLOPROPYL-5,11-DIHYDRO-4-METHYL-6H-DIPYRIDO[3,2-B:2',3'-E][1,4]DIAZEPIN-6-ONE	HIV-1 M:B_HXB2R	UniProt	P04585
1JLG	UC1	2-METHYL-FURAN-3-CARBOTHIOIC ACID [4-CHLORO-3-(3-METHYL-BUT-2-ENYLOXY)-PHENYL]-AMIDE	HIV-1 M:B_HXB2R	UniProt	P04585
1JLQ	SBN	2-AMINO-6-(3,5-DIMETHYLPHENYL)SULFONYLBENZONITRILE	HIV-1 M:B_HXB2R	UniProt	P04585
1KLM	SPP	(1-(5-METHANSULPHONAMIDO-1H-INDOL-2-YL-CARBONYL)4-[METHYLAMINO)PYRIDINYL]PIPERAZINE	Human immunodeficiency virus 1	UniProt	P04585
1LW0	NVP	11-CYCLOPROPYL-5,11-DIHYDRO-4-METHYL-6H-DIPYRIDO[3,2-B:2',3'-E][1,4]DIAZEPIN-6-ONE	Human immunodeficiency virus 1	UniProt	P04585
1LW2	U05	6,11-DIHYDRO-11-ETHYL-6-METHYL-9-NITRO-5H-PYRIDO[2,3-B][1,5]BENZODIAZEPIN-5-ONE	Human immunodeficiency virus 1	UniProt	P04585
1LWC	NVP	11-CYCLOPROPYL-5,11-DIHYDRO-4-METHYL-6H-DIPYRIDO[3,2-B:2',3'-E][1,4]DIAZEPIN-6-ONE	Human immunodeficiency virus 1	UniProt	P04585
1LWE	NVP	11-CYCLOPROPYL-5,11-DIHYDRO-4-METHYL-6H-DIPYRIDO[3,2-B:2',3'-E][1,4]DIAZEPIN-6-ONE	Human immunodeficiency virus 1	UniProt	P04585
1LWF	NVP	11-CYCLOPROPYL-5,11-DIHYDRO-4-METHYL-6H-DIPYRIDO[3,2-B:2',3'-E][1,4]DIAZEPIN-6-ONE	Human immunodeficiency virus 1	UniProt	P04585
1N5Y	MG	MAGNESIUM ION	Human immunodeficiency virus 1	UniProt	P03366
1N6Q	MG	MAGNESIUM ION	Human immunodeficiency virus 1	UniProt	P03366
1O1W			Human immunodeficiency virus 1	UniProt	P04585
1QE1			Human immunodeficiency virus type 1 BH10	UniProt	P03366
1R0A			Human immunodeficiency virus 1	UniProt	P03366
1RDH			Human immunodeficiency virus 1	UniProt	P03366
1REV	TB9	4-CHLORO-8-METHYL-7-(3-METHYL-BUT-2-ENYL)-6,7,8,9-TETRAHYDRO-2H-2,7,9A-TRIAZA-BENZO[CD]AZULENE-1-THIONE	Human immunodeficiency virus 1	UniProt	P04585
1RT1	MKC	6-BENZYL-1-ETHOXYMETHYL-5-ISOPROPYL URACIL	Human immunodeficiency virus 1	UniProt	P04585
1RT2	TNK	6-BENZYL-1-BENZYLOXYMETHYL-5-ISOPROPYL URACIL	Human immunodeficiency virus 1	UniProt	P04585
1RT3	U05	6,11-DIHYDRO-11-ETHYL-6-METHYL-9-NITRO-5H-PYRIDO[2,3-B][1,5]BENZODIAZEPIN-5-ONE	Human immunodeficiency virus 1	UniProt	P04585
1RT4	UC1	2-METHYL-FURAN-3-CARBOTHIOIC ACID [4-CHLORO-3-(3-METHYL-BUT-2-ENYLOXY)-PHENYL]-AMIDE	HIV-1 M:B_HXB2R	UniProt	P04585
1RT5	UC2	N-[4-CLORO-3-(T-BUTYLOXOME)PHENYL-2-METHYL-3-FURAN-CARBOTHIAMIDE	HIV-1 M:B_HXB2R	UniProt	P04585
1RT6	UC3	1-METHYL ETHYL 2-CHLORO-5-[[[(1-METHYLETHOXY)THIOOXO]METHYL]AMINO]-BENZOATE	HIV-1 M:B_HXB2R	UniProt	P04585
1RT7	UC4	1-METHYL ETHYL 1-CHLORO-5-[[(5,6DIHYDRO-2-METHYL-1,4-OXATHIIN-3-YL)CARBONYL]AMINO]BENZOATE	HIV-1 M:B_HXB2R	UniProt	P04585
1RTD	TTP	THYMIDINE-5'-TRIPHOSPHATE	Human immunodeficiency virus 1	UniProt	P03366
1RTH	U05	6,11-DIHYDRO-11-ETHYL-6-METHYL-9-NITRO-5H-PYRIDO[2,3-B][1,5]BENZODIAZEPIN-5-ONE	Human immunodeficiency virus 1	UniProt	P04585
1RTI	HEF	1-(2-HYDROXYETHYLOXYMETHYL)-6-PHENYL THIOTHYMINE	Human immunodeficiency virus 1	UniProt	P04585
1RTJ	CSD	3-SULFINOALANINE	Human immunodeficiency virus 1	UniProt	P04585
1S1T	UC1	2-METHYL-FURAN-3-CARBOTHIOIC ACID [4-CHLORO-3-(3-METHYL-BUT-2-ENYLOXY)-PHENYL]-AMIDE	Human immunodeficiency virus 1	UniProt	P04585
1S1U	NVP	11-CYCLOPROPYL-5,11-DIHYDRO-4-METHYL-6H-DIPYRIDO[3,2-B:2',3'-E][1,4]DIAZEPIN-6-ONE	Human immunodeficiency virus 1	UniProt	P04585
1S1V	TNK	6-BENZYL-1-BENZYLOXYMETHYL-5-ISOPROPYL URACIL	Human immunodeficiency virus 1	UniProt	P04585
1S1W	UC1	2-METHYL-FURAN-3-CARBOTHIOIC ACID [4-CHLORO-3-(3-METHYL-BUT-2-ENYLOXY)-PHENYL]-AMIDE	Human immunodeficiency virus 1	UniProt	P04585
1S1X	NVP	11-CYCLOPROPYL-5,11-DIHYDRO-4-METHYL-6H-DIPYRIDO[3,2-B:2',3'-E][1,4]DIAZEPIN-6-ONE	Human immunodeficiency virus 1	UniProt	P04585
1S6P	IET	1-(4-CYANO-PHENYL)-3-[2-(2,6-DICHLORO-PHENYL)-1-IMINO-ETHYL]-THIOUREA	Human immunodeficiency virus 1	UniProt	P03366
1S6Q	TPB	4-[4-(2,4,6-TRIMETHYL-PHENYLAMINO)-PYRIMIDIN-2-YLAMINO]-BENZONITRILE	Human immunodeficiency virus 1	UniProt	P03366
1S9E	ADB	4-[4-AMINO-6-(2,6-DICHLORO-PHENOXY)-[1,3,5]TRIAZIN-2-YLAMINO]-BENZONITRILE	Human immunodeficiency virus 1	UniProt	P03366
1S9G	ABZ	4-[4-AMINO-6-(5-CHLORO-1H-INDOL-4-YLMETHYL)-[1,3,5]TRIAZIN-2-YLAMINO]-BENZONITRILE	Human immunodeficiency virus 1	UniProt	P03366
1SUQ	185	(6-[4-(AMINOMETHYL)-2,6-DIMETHYLPHENOXY]-2-{[4-(AMINOMETHYL)PHENYL]AMINO}-5-BROMOPYRIMIDIN-4-YL)METHANOL	Human immunodeficiency virus 1	UniProt	P03366
1SV5	65B	4-({6-AMINO-5-BROMO-2-[(4-CYANOPHENYL)AMINO]PYRIMIDIN-4-YL}OXY)-3,5-DIMETHYLBENZONITRILE	Human immunodeficiency virus 1	UniProt	P03366
1T03	MG	MAGNESIUM ION	Human immunodeficiency virus 1	UniProt	P03366
1T05	TNV	[2-(6-AMINO-9H-PURIN-9-YL)-1-METHYLETHOXY]METHYL-TRIPHOSPHATE	Human immunodeficiency virus 1	UniProt	P03366
1TKT	H12	6-CHLORO-4-(CYCLOHEXYLOXY)-3-PROPYLQUINOLIN-2(1H)-ONE	Human immunodeficiency virus 1	UniProt	P04585
1TKX	GWB	4-[(CYCLOPROPYLETHYNYL)OXY]-6-FLUORO-3-ISOPROPYLQUINOLIN-2(1H)-ONE	Human immunodeficiency virus 1	UniProt	P04585
1TKZ	H16	6-CHLORO-4-(CYCLOHEXYLSULFANYL)-3-PROPYLQUINOLIN-2(1H)-ONE	Human immunodeficiency virus 1	UniProt	P04585
1TL1	H18	6-CHLORO-4-(CYCLOHEXYLSULFINYL)-3-PROPYLQUINOLIN-2(1H)-ONE	Human immunodeficiency virus 1	UniProt	P04585
1TL3	H20	6-CHLORO-4-(CYCLOHEXYLOXY)-3-ISOPROPYLQUINOLIN-2(1H)-ONE	Human immunodeficiency virus 1	UniProt	P04585
1TV6	CP9	3-[4-(2-METHYL-IMIDAZO[4,5-C]PYRIDIN-1-YL)BENZYL]-3H-BENZOTHIAZOL-2-ONE	Human immunodeficiency virus type 1 BH10	UniProt	P03366
1TVR	TB9	4-CHLORO-8-METHYL-7-(3-METHYL-BUT-2-ENYL)-6,7,8,9-TETRAHYDRO-2H-2,7,9A-TRIAZA-BENZO[CD]AZULENE-1-THIONE	Human immunodeficiency virus type 1 (CLONE 12)	UniProt	P03366
1UWB	TBO	5-CHLORO-8-METHYL-7-(3-METHYL-BUT-2-ENYL)-6,7,8,9-TETRAHYDRO-2H-2,7,9A-TRIAZA-BENZO[CD]AZULENE-1-THIONE	Human immunodeficiency virus 1	UniProt	P03366
1VRT	NVP	11-CYCLOPROPYL-5,11-DIHYDRO-4-METHYL-6H-DIPYRIDO[3,2-B:2',3'-E][1,4]DIAZEPIN-6-ONE	Human immunodeficiency virus 1	UniProt	P04585
1VRU	AAP	ALPHA-(2,6-DICHLOROPHENYL)-ALPHA-(2-ACETYL-5-METHYLANILINO)ACETAMIDE	Human immunodeficiency virus 1	UniProt	P04585
2B5J	3AC	(2E)-3-{3-[(5-ETHYL-3-IODO-6-METHYL-2-OXO-1,2-DIHYDROPYRIDIN-4-YL)OXY]PHENYL}ACRYLONITRILE	Human immunodeficiency virus 1	UniProt	P03366
2B6A	T50	1-(2,6-DIFLUOROBENZYL)-2-(2,6-DIFLUOROPHENYL)-4-METHYL-1H-BENZIMIDAZOLE	Human immunodeficiency virus 1	UniProt	P03366
2BAN	357	5-ETHYL-3-[(2-METHOXYETHYL)METHYLAMINO]-6-METHYL-4-(3-METHYLBENZYL)PYRIDIN-2(1H)-ONE	Human immunodeficiency virus 1	UniProt	P03366
2BE2	R22	4-(3,5-DIMETHYLPHENOXY)-5-(FURAN-2-YLMETHYLSULFANYLMETHYL)-3-IODO-6-METHYLPYRIDIN-2(1H)-ONE	Human immunodeficiency virus 1	UniProt	P03366
2HMI			Human immunodeficiency virus 1	UniProt	P03366
2HND	NVP	11-CYCLOPROPYL-5,11-DIHYDRO-4-METHYL-6H-DIPYRIDO[3,2-B:2',3'-E][1,4]DIAZEPIN-6-ONE	Human immunodeficiency virus 1	UniProt	P04585
2HNY	NVP	11-CYCLOPROPYL-5,11-DIHYDRO-4-METHYL-6H-DIPYRIDO[3,2-B:2',3'-E][1,4]DIAZEPIN-6-ONE	Human immunodeficiency virus 1	UniProt	P04585
2HNZ	PC0	1-[2-(4-ETHOXY-3-FLUOROPYRIDIN-2-YL)ETHYL]-3-(5-METHYLPYRIDIN-2-YL)THIOUREA	Human immunodeficiency virus 1	UniProt	P04585
2I5J	K05	(E)-3,4-DIHYDROXY-N'-[(2-METHOXYNAPHTHALEN-1-YL)METHYLENE]BENZOHYDRAZIDE	Human immunodeficiency virus 1
2IAJ	ATP	ADENOSINE-5'-TRIPHOSPHATE	Human immunodeficiency virus type 1 BH10	UniProt	P03366
2IC3	HBY	(S)-4-ISOPROPOXYCARBONYL-6-METHOXY-3-METHYLTHIOMETHYL-3,4-DIHYDROQUINOXALIN-2(1H)-THIONE	Human immunodeficiency virus type 1 BH10	UniProt	P03366
2JLE	I15	5-[(5-FLUORO-3-METHYL-1H-INDAZOL-4-YL)OXY]BENZENE-1,3-DICARBONITRILE	HUMAN IMMUNODEFICIENCY VIRUS 1	UniProt	Q72547
2OPP	HBQ	ISOPROPYL (2S)-2-ETHYL-7-FLUORO-3-OXO-3,4-DIHYDROQUINOXALINE-1(2H)-CARBOXYLATE	HIV-1 M:B_HXB2R	UniProt	P04585
2OPQ	HBQ	ISOPROPYL (2S)-2-ETHYL-7-FLUORO-3-OXO-3,4-DIHYDROQUINOXALINE-1(2H)-CARBOXYLATE	HIV-1 M:B_HXB2R	UniProt	P04585
2OPR	HBQ	ISOPROPYL (2S)-2-ETHYL-7-FLUORO-3-OXO-3,4-DIHYDROQUINOXALINE-1(2H)-CARBOXYLATE	HIV-1 M:B_HXB2R	UniProt	P04585
2OPS	HBQ	ISOPROPYL (2S)-2-ETHYL-7-FLUORO-3-OXO-3,4-DIHYDROQUINOXALINE-1(2H)-CARBOXYLATE	HIV-1 M:B_HXB2R	UniProt	P04585
2RF2	MRX	5-BROMO-3-(PYRROLIDIN-1-YLSULFONYL)-1H-INDOLE-2-CARBOXAMIDE	HIV-1 M:B_HXB2R	UniProt	P04585
2RKI	TT1	4-BENZYL-3-[(2-CHLOROBENZYL)SULFANYL]-5-THIOPHEN-2-YL-4H-1,2,4-TRIAZOLE	Human immunodeficiency virus 1	UniProt	P04585
2VG5	NNC	O-[2-(1,3-DIOXO-1,3-DIHYDRO-2H-ISOINDOL-2-YL)ETHYL] (4-CHLOROPHENYL)THIOCARBAMATE	HUMAN IMMUNODEFICIENCY VIRUS 1	UniProt	P03366
2VG6	NNB	O-[2-(1,3-DIOXO-1,3-DIHYDRO-2H-ISOINDOL-2-YL)ETHYL] (4-BROMOPHENYL)THIOCARBAMATE	HUMAN IMMUNODEFICIENCY VIRUS 1	UniProt	P03366
2VG7	NNI	O-[2-(1,3-DIOXO-1,3-DIHYDRO-2H-ISOINDOL-2-YL)ETHYL] (4-IODOPHENYL)THIOCARBAMATE	HUMAN IMMUNODEFICIENCY VIRUS 1	UniProt	P03366
2WOM	ZZE	5-{[3,5-DIETHYL-1-(2-HYDROXYETHYL)-1H-PYRAZOL-4-YL]OXY}BENZENE-1,3-DICARBONITRILE	HUMAN IMMUNODEFICIENCY VIRUS 1	UniProt	P04585
2WON	ZZE	5-{[3,5-DIETHYL-1-(2-HYDROXYETHYL)-1H-PYRAZOL-4-YL]OXY}BENZENE-1,3-DICARBONITRILE	HUMAN IMMUNODEFICIENCY VIRUS 1	UniProt	P04585
2YKM	YKN	2-[DIFLUORO-[(4-METHYL-PYRIMIDINYL)-THIO]METHYL]-BENZOXAZOLE	HUMAN IMMUNODEFICIENCY VIRUS TYPE 1 BH10	UniProt	P03366
2YKN	YKN	2-[DIFLUORO-[(4-METHYL-PYRIMIDINYL)-THIO]METHYL]-BENZOXAZOLE	HUMAN IMMUNODEFICIENCY VIRUS TYPE 1 BH10	UniProt	P03366
2YNF	WHU	2-AZANYL-N-[[4-BROMANYL-3-(3-CHLORANYL-5-CYANO-PHENOXY)-2-FLUORANYL-PHENYL]METHYL]-4-CHLORANYL-1H-IMIDAZOLE-5-CARBOXAMIDE	HIV-1 M\:B_HXB2R	UniProt	P04585
2YNG	WHU	2-AZANYL-N-[[4-BROMANYL-3-(3-CHLORANYL-5-CYANO-PHENOXY)-2-FLUORANYL-PHENYL]METHYL]-4-CHLORANYL-1H-IMIDAZOLE-5-CARBOXAMIDE	HIV-1 M\:B_HXB2R	UniProt	P04585
2YNH	EUR	4-CHLORANYL-N-[[4-CHLORANYL-3-(3-CHLORANYL-5-CYANO-PHENOXY)-2-FLUORANYL-PHENYL]METHYL]-2-(HYDROXYMETHYL)-1H-IMIDAZOLE-5-CARBOXAMIDE	HIV-1 M\:B_HXB2R	UniProt	P04585
2YNI	CXD	4-CHLORANYL-N-[[4-CHLORANYL-3-(3-CHLORANYL-5-CYANO-PHENOXY)-2-FLUORANYL-PHENYL]METHYL]-1H-IMIDAZOLE-5-CARBOXAMIDE	HIV-1 M\:B_HXB2R	UniProt	P04585
2ZD1	T27	4-{[4-({4-[(E)-2-CYANOETHENYL]-2,6-DIMETHYLPHENYL}AMINO)PYRIMIDIN-2-YL]AMINO}BENZONITRILE	Human immunodeficiency virus 1	UniProt	P03366
2ZE2	T27	4-{[4-({4-[(E)-2-CYANOETHENYL]-2,6-DIMETHYLPHENYL}AMINO)PYRIMIDIN-2-YL]AMINO}BENZONITRILE	Human immunodeficiency virus 1	UniProt	P03366
3BGR	T27	4-{[4-({4-[(E)-2-CYANOETHENYL]-2,6-DIMETHYLPHENYL}AMINO)PYRIMIDIN-2-YL]AMINO}BENZONITRILE	Human immunodeficiency virus 1	UniProt	P03366
3C6T	M14	2-[3-CHLORO-5-(3-CHLORO-5-CYANOPHENOXY)PHENOXY]-N-(2-CHLORO-4-SULFAMOYLPHENYL)ACETAMIDE	HIV-1 M:B_HXB2R	UniProt	P04585
3C6U	M22	3-CHLORO-5-[2-CHLORO-5-(1H-INDAZOL-3-YLMETHOXY)PHENOXY]BENZONITRILE	HIV-1 M:B_HXB2R	UniProt	P04585
3DI6	PDZ	6-(4-CHLORO-2-FLUORO-3-PHENOXYBENZYL)PYRIDAZIN-3(2H)-ONE	Human immunodeficiency virus type 1 (HXB2 isolate)	UniProt	P04585
3DLE	GFA	2-[4-CHLORO-2-(PHENYLCARBONYL)PHENOXY]-N-PHENYLACETAMIDE	HIV-1 M:B_HXB2R	UniProt	P04585
3DLG	GWE	N-{4-[AMINO(DIHYDROXY)-LAMBDA~4~-SULFANYL]-2-METHYLPHENYL}-2-(4-CHLORO-2-{[3-FLUORO-5-(TRIFLUOROMETHYL)PHENYL]CARBONYL}PHENOXY)ACETAMIDE	HIV-1 M:B_HXB2R	UniProt	P04585
3DLK	SO4	SULFATE ION	Human immunodeficiency virus type 1 BH10	UniProt	P03366
3DM2	GWE	N-{4-[AMINO(DIHYDROXY)-LAMBDA~4~-SULFANYL]-2-METHYLPHENYL}-2-(4-CHLORO-2-{[3-FLUORO-5-(TRIFLUOROMETHYL)PHENYL]CARBONYL}PHENOXY)ACETAMIDE	Human immunodeficiency virus type 1	UniProt	A7YKL0
3DMJ	GWE	N-{4-[AMINO(DIHYDROXY)-LAMBDA~4~-SULFANYL]-2-METHYLPHENYL}-2-(4-CHLORO-2-{[3-FLUORO-5-(TRIFLUOROMETHYL)PHENYL]CARBONYL}PHENOXY)ACETAMIDE	Human immunodeficiency virus type 1	UniProt	A7YKL0
3DOK	GWJ	2-{4-CHLORO-2-[(3-CHLORO-5-CYANOPHENYL)CARBONYL]PHENOXY}-N-(2-METHYL-4-SULFAMOYLPHENYL)ACETAMIDE	Human immunodeficiency virus type 1	UniProt	A7YKL0
3DOL	GWI	N-({4-[({4-CHLORO-2-[(3-CHLORO-5-CYANOPHENYL)CARBONYL]PHENOXY}ACETYL)AMINO]-3-METHYLPHENYL}SULFONYL)PROPANAMIDE	Human immunodeficiency virus type 1	UniProt	A7YKL0
3DRP	R8E	3-{5-[(6-AMINO-1H-PYRAZOLO[3,4-B]PYRIDIN-3-YL)METHOXY]-2-CHLOROPHENOXY}-5-CHLOROBENZONITRILE	Human immunodeficiency virus type 1	UniProt	P04585
3DRR	R8E	3-{5-[(6-AMINO-1H-PYRAZOLO[3,4-B]PYRIDIN-3-YL)METHOXY]-2-CHLOROPHENOXY}-5-CHLOROBENZONITRILE	Human immunodeficiency virus type 1	UniProt	P04585
3DRS	R8D	3-CHLORO-5-[2-CHLORO-5-(1H-PYRAZOLO[3,4-B]PYRIDIN-3-YLMETHOXY)PHENOXY]BENZONITRILE	Human immunodeficiency virus type 1	UniProt	P04585
3DYA	PZL	3-[6-BROMO-2-FLUORO-3-(1H-PYRAZOLO[3,4-C]PYRIDAZIN-3-YLMETHYL)PHENOXY]-5-CHLOROBENZONITRILE	HIV-1 M:B_HXB2R	UniProt	P04585
3E01	PZ2	3-[2-BROMO-4-(1H-PYRAZOLO[3,4-C]PYRIDAZIN-3-YLMETHYL)PHENOXY]-5-METHYLBENZONITRILE	Human immunodeficiency virus type 1	UniProt	P04585
3FFI	3OB	3-CHLORO-5-({6-[2-(3,4-DIHYDROISOQUINOLIN-2(1H)-YL)-2-OXOETHYL]-3-(DIMETHYLAMINO)-2-OXO-1,2-DIHYDROPYRIDIN-4-YL}OXY)BENZONITRILE	HIV-1 M:B_HXB2R	UniProt	P04585
3HVT	NVP	11-CYCLOPROPYL-5,11-DIHYDRO-4-METHYL-6H-DIPYRIDO[3,2-B:2',3'-E][1,4]DIAZEPIN-6-ONE	Human immunodeficiency virus 1	UniProt	P03366
3HYF	ON1	2-(3,4-DICHLOROBENZYL)-5,6-DIHYDROXYPYRIMIDINE-4-CARBOXYLIC ACID	Human immunodeficiency virus 1,Escherichia coli	UniProt, UniProt	Q72547, P0A7Y4
3I0R	RT3	S-{2-[(2-CHLORO-4-SULFAMOYLPHENYL)AMINO]-2-OXOETHYL} 6-METHYL-3,4-DIHYDROQUINOLINE-1(2H)-CARBOTHIOATE	HIV-1 M:B_HXB2R	UniProt	P04585
3I0S	RT7	S-{2-[(2-CHLORO-4-SULFAMOYLPHENYL)AMINO]-2-OXOETHYL} 6,8-DICHLORO-3,4-DIHYDROQUINOLINE-1(2H)-CARBOTHIOATE	HIV-1 M:B_HXB2R	UniProt	P04585
3IG1	JTH	2,7-DIHYDROXY-4-(PROPAN-2-YL)CYCLOHEPTA-2,4,6-TRIEN-1-ONE	Human immunodeficiency virus type 1 BH10	UniProt	P03366
3IRX	UDR	(E)-S-METHYL 5-(1-(3,7-DIMETHYL-2-OXO-2,3-DIHYDROBENZO[D]OXAZOL-5-YL)-5-(5-METHYL-1,3,4-OXADIAZOL-2-YL)PENT-1-ENYL)-2-METHOXY-3-METHYLBENZOTHIOATE	Human immunodeficiency virus type 1 BH10	UniProt	P03366
3IS9	AC7	DIMETHYL 3,3'-(6-METHOXY-6-OXOHEX-1-ENE-1,1-DIYL)BIS(5-CYANO-6-METHOXYBENZOATE)	Human immunodeficiency virus type 1 BH10	UniProt	P03366
3ISN	EDM	6-ETHENYL-N,N-DIMETHYL-2-(METHYLSULFONYL)PYRIMIDIN-4-AMINE	Human immunodeficiency virus	UniProt	P03366
3ITH	EDM	6-ETHENYL-N,N-DIMETHYL-2-(METHYLSULFONYL)PYRIMIDIN-4-AMINE	Human immunodeficiency virus	UniProt	P03366
3JSM	TNV	[2-(6-AMINO-9H-PURIN-9-YL)-1-METHYLETHOXY]METHYL-TRIPHOSPHATE	Human immunodeficiency virus type 1	UniProt	P03366
3JYT	DTP	2'-DEOXYADENOSINE 5'-TRIPHOSPHATE	Human immunodeficiency virus type 1	UniProt	P03366
3K2P	JTH	2,7-DIHYDROXY-4-(PROPAN-2-YL)CYCLOHEPTA-2,4,6-TRIEN-1-ONE	Human immunodeficiency virus type 1	UniProt	P03366
3KJV			Human immunodeficiency virus type 1	UniProt	P04585
3KK1	914	[(2R,5R)-5-(6-AMINOPURIN-9-YL)-4-FLUORO-2,5-DIHYDROFURAN-2-YL]OXYMETHYL-[HYDROXY(PHOSPHONOOXY)PHOSPHORYL]OXY-PHOSPHINIC ACID	Human immunodeficiency virus type 1	UniProt	P04585
3KK2	DTP	2'-DEOXYADENOSINE 5'-TRIPHOSPHATE	Human immunodeficiency virus type 1	UniProt	P04585
3KK3	MG	MAGNESIUM ION	Human immunodeficiency virus type 1	UniProt	P04585
3KLE	ZP4	[[[[(2R,3S,4R,5R)-5-(6-AMINOPURIN-9-YL)-3,4-DIHYDROXY-OXOLAN-2-YL]METHOXY-HYDROXY-PHOSPHORYL]OXY-HYDROXY-PHOSPHORYL]OXY-HYDROXY-PHOSPHORYL] [(2S,3S,5R)-3-AZIDO-5-(5-METHYL-2,4-DIOXO-PYRIMIDIN-1-YL)OXOLAN-2-YL]METHYL HYDROGEN PHOSPHATE	Human immunodeficiency virus type 1	UniProt	P03366
3KLF	ZP4	[[[[(2R,3S,4R,5R)-5-(6-AMINOPURIN-9-YL)-3,4-DIHYDROXY-OXOLAN-2-YL]METHOXY-HYDROXY-PHOSPHORYL]OXY-HYDROXY-PHOSPHORYL]OXY-HYDROXY-PHOSPHORYL] [(2S,3S,5R)-3-AZIDO-5-(5-METHYL-2,4-DIOXO-PYRIMIDIN-1-YL)OXOLAN-2-YL]METHYL HYDROGEN PHOSPHATE	Human immunodeficiency virus type 1	UniProt	P03366
3KLG			Human immunodeficiency virus type 1	UniProt	P03366
3KLH	MG	MAGNESIUM ION	Human immunodeficiency virus type 1	UniProt	P03366
3KLI			Human immunodeficiency virus type 1	UniProt	P03366
3LAK	KR1	3-({3-[(2-AMINO-6-FLUOROPYRIDIN-4-YL)METHYL]-5-(1-METHYLETHYL)-2,6-DIOXO-1,2,3,6-TETRAHYDROPYRIMIDIN-4-YL}CARBONYL)-5-METHYLBENZONITRILE	Human immunodeficiency virus type 1	UniProt	P04585
3LAL	KRV	3-{[3-ETHYL-5-(1-METHYLETHYL)-2,6-DIOXO-1,2,3,6-TETRAHYDROPYRIMIDIN-4-YL]CARBONYL}-5-METHYLBENZONITRILE	Human immunodeficiency virus type 1	UniProt	P04585
3LAM	KRP	3-METHYL-5-{[5-(1-METHYLETHYL)-2,6-DIOXO-3-PROPYL-1,2,3,6-TETRAHYDROPYRIMIDIN-4-YL]CARBONYL}BENZONITRILE	Human immunodeficiency virus type 1	UniProt	P04585
3LAN	KBT	3-{[3-BUTYL-5-(1-METHYLETHYL)-2,6-DIOXO-1,2,3,6-TETRAHYDROPYRIMIDIN-4-YL]CARBONYL}-5-METHYLBENZONITRILE	Human immunodeficiency virus type 1	UniProt	P04585
3LP0	NVP	11-CYCLOPROPYL-5,11-DIHYDRO-4-METHYL-6H-DIPYRIDO[3,2-B:2',3'-E][1,4]DIAZEPIN-6-ONE	Human immunodeficiency virus type 1	UniProt	P04585
3LP1	NVP	11-CYCLOPROPYL-5,11-DIHYDRO-4-METHYL-6H-DIPYRIDO[3,2-B:2',3'-E][1,4]DIAZEPIN-6-ONE	Human immunodeficiency virus type 1	UniProt	P04585
3LP2	LP9	3-[4-(DIETHYLAMINO)PHENOXY]-6-(ETHOXYCARBONYL)-5,8-DIHYDROXY-7-OXO-7,8-DIHYDRO-1,8-NAPHTHYRIDIN-1-IUM	Human immunodeficiency virus type 1	UniProt	P04585
3LP3	LP9	3-[4-(DIETHYLAMINO)PHENOXY]-6-(ETHOXYCARBONYL)-5,8-DIHYDROXY-7-OXO-7,8-DIHYDRO-1,8-NAPHTHYRIDIN-1-IUM	Human immunodeficiency virus type 1	UniProt	P0C6F2
3M8P	65B	4-({6-AMINO-5-BROMO-2-[(4-CYANOPHENYL)AMINO]PYRIMIDIN-4-YL}OXY)-3,5-DIMETHYLBENZONITRILE	Human immunodeficiency virus type 1	UniProt	P04585
3M8Q	DJZ	3,5-DIMETHYL-4-{[2-({1-[4-(METHYLSULFONYL)BENZYL]PIPERIDIN-4-YL}AMINO)PYRIMIDIN-4-YL]OXY}BENZONITRILE	Human immunodeficiency virus type 1	UniProt	P04585
3MEC	65B	4-({6-AMINO-5-BROMO-2-[(4-CYANOPHENYL)AMINO]PYRIMIDIN-4-YL}OXY)-3,5-DIMETHYLBENZONITRILE	HIV-1 M:B_HXB2R	UniProt	P04585
3MED	65B	4-({6-AMINO-5-BROMO-2-[(4-CYANOPHENYL)AMINO]PYRIMIDIN-4-YL}OXY)-3,5-DIMETHYLBENZONITRILE	HIV-1 M:B_HXB2R	UniProt	P04585
3MEE	T27	4-{[4-({4-[(E)-2-CYANOETHENYL]-2,6-DIMETHYLPHENYL}AMINO)PYRIMIDIN-2-YL]AMINO}BENZONITRILE	HIV-1 M:B_HXB2R	UniProt	P04585
3MEG	T27	4-{[4-({4-[(E)-2-CYANOETHENYL]-2,6-DIMETHYLPHENYL}AMINO)PYRIMIDIN-2-YL]AMINO}BENZONITRILE	HIV-1 M:B_HXB2R	UniProt	P04585
3NBP	JGZ	4-(4-{[4-(4-CYANO-2,6-DIMETHYLPHENOXY)PYRIMIDIN-2-YL]AMINO}PIPERIDIN-1-YL)BENZENESULFONAMIDE	Human immunodeficiency virus type 1 group M subtype B	UniProt	P04585
3QIN	P1Y	2-(3-BROMO-4-METHOXYBENZYL)-5,6-DIHYDROXYPYRIMIDINE-4-CARBOXYLIC ACID	HIV-1 M:B_HXB2R	UniProt, UniProt	Q72547, P0A7Y4
3QIO	QID	3-HYDROXY-6-(PHENYLSULFONYL)QUINAZOLINE-2,4(1H,3H)-DIONE	HIV-1 M:B_HXB2R	UniProt, UniProt	Q72547, P0A7Y4
3QIP	NVP	11-CYCLOPROPYL-5,11-DIHYDRO-4-METHYL-6H-DIPYRIDO[3,2-B:2',3'-E][1,4]DIAZEPIN-6-ONE	HIV-1 M:B_HXB2R	UniProt	P04585
3QLH	T27	4-{[4-({4-[(E)-2-CYANOETHENYL]-2,6-DIMETHYLPHENYL}AMINO)PYRIMIDIN-2-YL]AMINO}BENZONITRILE	Human immunodeficiency virus type 1	UniProt	P03366
3QO9	QO9	1-[(5R,6R,8R,9R)-4-AMINO-9-{[TERT-BUTYL(DIMETHYL)SILYL]OXY}-6-({[TERT-BUTYL(DIMETHYL)SILYL]OXY}METHYL)-2,2-DIOXIDO-1,7-DIOXA-2-THIASPIRO[4.4]NON-3-EN-8-YL]-5-METHYLPYRIMIDINE-2,4(1H,3H)-DIONE	Human immunodeficiency virus type 1 BH10	UniProt	P03366
3T19	5MA	1-(2,5-DICHLORO-3-{[5-CHLORO-1-(2H-PYRAZOLO[3,4-B]PYRIDIN-3-YLMETHYL)-1H-BENZOTRIAZOL-4-YL]OXY}PHENYL)METHANAMINE	HIV-1 M:B_HXB2R	UniProt	P04585
3T1A	5MA	1-(2,5-DICHLORO-3-{[5-CHLORO-1-(2H-PYRAZOLO[3,4-B]PYRIDIN-3-YLMETHYL)-1H-BENZOTRIAZOL-4-YL]OXY}PHENYL)METHANAMINE	HIV-1 M:B_HXB2R	UniProt	P04585
3TAM	M06	3-CHLORO-5-{[4-METHYL-2-OXO-1-(2H-PYRAZOLO[3,4-B]PYRIDIN-3-YLMETHYL)-1,2-DIHYDROPYRIDIN-3-YL]OXY}BENZONITRILE	HIV-1 M:B_HXB2R	UniProt	P04585
3V4I	AZT	3'-AZIDO-3'-DEOXYTHYMIDINE-5'-TRIPHOSPHATE	Human immunodeficiency virus type 1 BH10	UniProt	P03366
3V6D			Human immunodeficiency virus type 1 BH10	UniProt	P03366
3V81	NVP	11-CYCLOPROPYL-5,11-DIHYDRO-4-METHYL-6H-DIPYRIDO[3,2-B:2',3'-E][1,4]DIAZEPIN-6-ONE	Human immunodeficiency virus type 1 BH10	UniProt	P03366
4B3O	EFZ	(-)-6-CHLORO-4-CYCLOPROPYLETHYNYL-4-TRIFLUOROMETHYL-1,4-DIHYDRO-2H-3,1-BENZOXAZIN-2-ONE	HUMAN IMMUNODEFICIENCY VIRUS 1	UniProt	P04585
4B3P			HUMAN IMMUNODEFICIENCY VIRUS 1	UniProt	P04585
4B3Q	NVP	11-CYCLOPROPYL-5,11-DIHYDRO-4-METHYL-6H-DIPYRIDO[3,2-B:2',3'-E][1,4]DIAZEPIN-6-ONE	HUMAN IMMUNODEFICIENCY VIRUS 1	UniProt	P04585
4DG1			Human immunodeficiency virus type 1	UniProt	P03366
4G1Q	T27	4-{[4-({4-[(E)-2-CYANOETHENYL]-2,6-DIMETHYLPHENYL}AMINO)PYRIMIDIN-2-YL]AMINO}BENZONITRILE	Human immunodeficiency virus type 1	UniProt	P03366
4H4M	494	(2E)-3-(3-CHLORO-5-{4-CHLORO-2-[2-(2,4-DIOXO-3,4-DIHYDROPYRIMIDIN-1(2H)-YL)ETHOXY]PHENOXY}PHENYL)PROP-2-ENENITRILE	Human immunodeficiency virus type 1	UniProt	P03366
4H4O	506	(2E)-3-(3-{2-[2-(2,4-DIOXO-3,4-DIHYDROPYRIMIDIN-1(2H)-YL)ETHOXY]-4-FLUOROPHENOXY}-5-FLUOROPHENYL)PROP-2-ENENITRILE	Human immunodeficiency virus type 1 BH10	UniProt	P03366
4I2P	G73	(2E)-3-[4-({6-[(4-METHOXYPHENYL)AMINO]-7H-PURIN-2-YL}AMINO)-3,5-DIMETHYLPHENYL]PROP-2-ENENITRILE	Human immunodeficiency virus type 1 BH10	UniProt	P03366
4I2Q	1BT	(2E)-3-(4-{[6-(1,3-BENZOTHIAZOL-5-YLAMINO)-9H-PURIN-2-YL]AMINO}-3,5-DIMETHYLPHENYL)PROP-2-ENENITRILE	Human immunodeficiency virus type 1 BH10	UniProt	P03366
4I7F	NVE	DIETHYL ({4-[2-(11-ETHYL-5-METHYL-6-OXO-6,11-DIHYDRO-5H-DIPYRIDO[3,2-B:2',3'-E][1,4]DIAZEPIN-8-YL)ETHYL]PHENOXY}METHYL)PHOSPHONATE	HIV-1 M:B_HXB2R	UniProt	P04585
4ICL	T27	4-{[4-({4-[(E)-2-CYANOETHENYL]-2,6-DIMETHYLPHENYL}AMINO)PYRIMIDIN-2-YL]AMINO}BENZONITRILE	Human immunodeficiency virus type 1	UniProt	P03366
4ID5	T27	4-{[4-({4-[(E)-2-CYANOETHENYL]-2,6-DIMETHYLPHENYL}AMINO)PYRIMIDIN-2-YL]AMINO}BENZONITRILE	Human immunodeficiency virus type 1	UniProt	P03366
4IDK	T27	4-{[4-({4-[(E)-2-CYANOETHENYL]-2,6-DIMETHYLPHENYL}AMINO)PYRIMIDIN-2-YL]AMINO}BENZONITRILE	Human immunodeficiency virus type 1	UniProt	P03366
4IFV	T27	4-{[4-({4-[(E)-2-CYANOETHENYL]-2,6-DIMETHYLPHENYL}AMINO)PYRIMIDIN-2-YL]AMINO}BENZONITRILE	Human immunodeficiency virus type 1	UniProt	P03366
4IFY	T27	4-{[4-({4-[(E)-2-CYANOETHENYL]-2,6-DIMETHYLPHENYL}AMINO)PYRIMIDIN-2-YL]AMINO}BENZONITRILE	Human immunodeficiency virus type 1	UniProt	P03366
4IG0	1FG	2-({[2-(3,4-DIHYDROQUINOLIN-1(2H)-YL)-2-OXOETHYL](METHYL)AMINO}METHYL)QUINAZOLIN-4(1H)-ONE	Human immunodeficiency virus type 1	UniProt	P03366
4IG3	T27	4-{[4-({4-[(E)-2-CYANOETHENYL]-2,6-DIMETHYLPHENYL}AMINO)PYRIMIDIN-2-YL]AMINO}BENZONITRILE	Human immunodeficiency virus type 1	UniProt	P03366
4KFB	T27	4-{[4-({4-[(E)-2-CYANOETHENYL]-2,6-DIMETHYLPHENYL}AMINO)PYRIMIDIN-2-YL]AMINO}BENZONITRILE	HUMAN IMMUNODEFICIENCY VIRUS TYPE 1	UniProt	P03366
4KKO	1RE	4-({4-METHOXY-6-[2-(MORPHOLIN-4-YL)ETHOXY]-1,3,5-TRIAZIN-2-YL}AMINO)-2-(3-METHYLBUTOXY)BENZONITRILE	Human immunodeficiency virus type 1	UniProt	P03366
4KO0	JLJ	4-[(4-METHOXYPYRIMIDIN-2-YL)AMINO]-2-[(3-METHYLBUT-2-EN-1-YL)OXY]BENZONITRILE	Human immunodeficiency virus type 1	UniProt	P03366
4KSE	EDO	1,2-ETHANEDIOL	Human immunodeficiency virus type 1 group M subtype B	UniProt	P04585
4KV8	1WT	11-ETHYL-5-METHYL-8-[2-(1-OXIDANYLQUINOLIN-4-YL)OXYETHYL]DIPYRIDO[3,2-[1,4]DIAZEPIN-6-ONE	HIV-1 M:B_HXB2R	UniProt	P04585
4LSL	1YQ	(2E)-3-(3-{4-CHLORO-2-[2-(2,4-DIOXO-3,4-DIHYDROPYRIMIDIN-1(2H)-YL)ETHOXY]PHENOXY}PHENYL)PROP-2-ENENITRILE	Human immunodeficiency virus type 1	UniProt	P03366
4LSN	1YR	(2E)-3-(3-BROMO-5-{4-CHLORO-2-[2-(2,4-DIOXO-3,4-DIHYDROPYRIMIDIN-1(2H)-YL)ETHOXY]PHENOXY}PHENYL)PROP-2-ENENITRILE	Human immunodeficiency virus type 1	UniProt	P03366
4MFB	29T	8-{2-[2-(2,4-DIOXO-3,4-DIHYDROPYRIMIDIN-1(2H)-YL)ETHOXY]PHENOXY}INDOLIZINE-2-CARBONITRILE	Human immunodeficiency virus type 1	UniProt	P03366
4NCG	2KW	3-CHLORO-5-({1-[(4-METHYL-5-OXO-4,5-DIHYDRO-1H-1,2,4-TRIAZOL-3-YL)METHYL]-2-OXO-4-(TRIFLUOROMETHYL)-1,2-DIHYDROPYRIDIN-3-YL}OXY)BENZONITRILE	Human immunodeficiency virus 1	UniProt	P04585
4O44	2RS	4-({4-[3-(MORPHOLIN-4-YL)PROPOXY]-6-[(2,4,6-TRIMETHYLPHENYL)AMINO]-1,3,5-TRIAZIN-2-YL}AMINO)BENZONITRILE	Human immunodeficiency virus type 1 BH10	UniProt	P03366
4O4G	2RT	4-({4-[(2,4,6-TRIMETHYLPHENYL)AMINO]-1,3,5-TRIAZIN-2-YL}AMINO)BENZONITRILE	Human immunodeficiency virus type 1 BH10	UniProt	P03366
4PQU	DTP	2'-DEOXYADENOSINE 5'-TRIPHOSPHATE	Human immunodeficiency virus type 1	UniProt	P03366
4PUO	NVP	11-CYCLOPROPYL-5,11-DIHYDRO-4-METHYL-6H-DIPYRIDO[3,2-B:2',3'-E][1,4]DIAZEPIN-6-ONE	Human immunodeficiency virus type 1	UniProt	P03366
4PWD	NVP	11-CYCLOPROPYL-5,11-DIHYDRO-4-METHYL-6H-DIPYRIDO[3,2-B:2',3'-E][1,4]DIAZEPIN-6-ONE	Human immunodeficiency virus type 1	UniProt	P03366
4Q0B	NVP	11-CYCLOPROPYL-5,11-DIHYDRO-4-METHYL-6H-DIPYRIDO[3,2-B:2',3'-E][1,4]DIAZEPIN-6-ONE	Human immunodeficiency virus type 1	UniProt	P03366
4QAG	F95	(7,8-DIHYDROXY-2-OXO-2H-CHROMEN-4-YL)ACETIC ACID	Human immunodeficiency virus type 1	UniProt	P03366
4R5P	3JY	[(1R)-2-METHOXY-1-{[(1S,3R)-3-(5-METHYL-2,4-DIOXO-3,4-DIHYDROPYRIMIDIN-1(2H)-YL)CYCLOPENTYL]OXY}-2-OXOETHYL]PHOSPHONIC ACID	Human immunodeficiency virus type 1	UniProt	P03366
4RW4	494	(2E)-3-(3-CHLORO-5-{4-CHLORO-2-[2-(2,4-DIOXO-3,4-DIHYDROPYRIMIDIN-1(2H)-YL)ETHOXY]PHENOXY}PHENYL)PROP-2-ENENITRILE	Human immunodeficiency virus type 1 BH10	UniProt	P03366
4RW6	494	(2E)-3-(3-CHLORO-5-{4-CHLORO-2-[2-(2,4-DIOXO-3,4-DIHYDROPYRIMIDIN-1(2H)-YL)ETHOXY]PHENOXY}PHENYL)PROP-2-ENENITRILE	Human immunodeficiency virus type 1 BH10	UniProt	P03366
4RW7	3X6	(2E)-3-(3-CHLORO-5-{2-[2-(2,4-DIOXO-3,4-DIHYDROPYRIMIDIN-1(2H)-YL)ETHOXY]PHENOXY}PHENYL)PROP-2-ENENITRILE	Human immunodeficiency virus type 1 BH10	UniProt	P03366
4RW8	3X6	(2E)-3-(3-CHLORO-5-{2-[2-(2,4-DIOXO-3,4-DIHYDROPYRIMIDIN-1(2H)-YL)ETHOXY]PHENOXY}PHENYL)PROP-2-ENENITRILE	Human immunodeficiency virus type 1 BH10	UniProt	P03366
4RW9	3X6	(2E)-3-(3-CHLORO-5-{2-[2-(2,4-DIOXO-3,4-DIHYDROPYRIMIDIN-1(2H)-YL)ETHOXY]PHENOXY}PHENYL)PROP-2-ENENITRILE	Human immunodeficiency virus type 1 BH10	UniProt	P03366
4WE1	3LQ	5-{2-[2-(2,4-dioxo-3,4-dihydropyrimidin-1(2H)-yl)ethoxy]phenoxy}naphthalene-2-carbonitrile	Human immunodeficiency virus type 1 group M subtype B	UniProt	P03366
4ZHR			Human immunodeficiency virus 1	PDB	4ZHR
5C24	4XO	6-({4-[(4-cyanophenyl)amino]-1,3,5-triazin-2-yl}amino)-5,7-dimethylindolizine-2-carbonitrile	Human immunodeficiency virus type 1 group M subtype B (isolate BH10)	UniProt	P03366
5C25	639	6-({4-[(4-cyanophenyl)amino]-1,3,5-triazin-2-yl}amino)-5,7- dimethyl-2-naphthonitrile	Human immunodeficiency virus type 1 group M subtype B (isolate BH10)	UniProt	P03366
5C42	29T	8-{2-[2-(2,4-dioxo-3,4-dihydropyrimidin-1(2H)-yl)ethoxy]phenoxy}indolizine-2-carbonitrile	Human immunodeficiency virus type 1 group M subtype B (isolate BH10)	UniProt	P03366
5D3G			Human immunodeficiency virus type 1 group M subtype B (isolate BH10)	UniProt	P03366
